# Supplementary material
Source: PubMed Central journal article supplement (PMC3381988)
Supplement: NIHMS283036-supplement-1_si_001.pdf [file NIHMS283036-supplement-1_si_001.pdf]

## Electronic Supporting Information for

### *Catalytic Reduction of Dioxygen to Water with a Monomeric Manganese Complex at Room Temperature*

Ryan L. Shook,<sup>†</sup> Sonja M. Peterson,<sup>†</sup> John Greaves,<sup>†</sup> Curtis Moore,<sup>‡</sup> Arnold L. Rheingold<sup>‡</sup> and A.S. Borovik<sup>\*†</sup>

Department of Chemistry, University of California-Irvine, 1102 Natural Science II, Irvine, CA 92697-2025 and the Department of Chemistry and Biochemistry, University of California-San Diego, San Diego, 92093-0332

Email: aborovik@uci.edu

#### Contents

|                  |           |
|------------------|-----------|
| <b>TableS1</b>   | <b>S2</b> |
| <b>Table S2</b>  | <b>S2</b> |
| <b>Table S3</b>  | <b>S3</b> |
| <b>Table S4</b>  | <b>S3</b> |
| <b>Table S5</b>  | <b>S3</b> |
| <b>Table S6</b>  | <b>S4</b> |
| <b>Figure S1</b> | <b>S5</b> |
| <b>Figure S2</b> | <b>S6</b> |
| <b>Figure S3</b> | <b>S6</b> |
| <b>Figure S4</b> | <b>S7</b> |

**Table S1.** Results from Reactions of  $[\text{Mn}^{\text{II}}\text{H}_2\text{bupa}]^-$  with DPH and a Known Amount of Dioxygen.<sup>a</sup>

| Amount of O <sub>2</sub> (equiv) | Azobenzene (equiv) | DPH (equiv) |
|----------------------------------|--------------------|-------------|
| 1                                | 1.8                | 8.2         |
| 1                                | 2.0                | 8.0         |
| 1                                | 2.1                | 7.9         |
| Average                          | 2.0                | 8.0         |
| 2                                | 4.1                | 5.9         |
| 2                                | 3.9                | 6.1         |
| 2                                | 3.9                | 6.1         |
| Average                          | 4.0                | 6.0         |
| 3                                | 5.4                | 4.6         |
| 3                                | 6.2                | 3.8         |
| 3                                | 6.0                | 4.0         |
| Average                          | 5.9                | 4.1         |
| 4                                | 7.8                | 2.2         |
| 4                                | 8.0                | 2.0         |
| 4                                | 8.4                | 1.6         |
| Average                          | 8.1                | 1.9         |
| 5                                | 9.5                | 0.5         |
| 5                                | 10.                | 0.03        |
| 5                                | 9.8                | 0.2         |
| Average                          | 9.8                | 0.2         |

<sup>a</sup>Data in this table were used to generated Table 3.

**Table S2.** Relative Amounts of Water and Azobenzene Produced from Reactions of  $[\text{Mn}^{\text{II}}\text{H}_2\text{bupa}]^-$  with DPH and Excess Dioxygen as Determined by <sup>1</sup>H NMR Spectroscopy.

| Run            | Relative Amt. DMSO | Relative Mole Ratio of H <sub>2</sub> O <sup>b</sup> | Relative Mole Ratio of Azobenzene | Relative Mole Ratio of DPH | Relative Percent Yield           |
|----------------|--------------------|------------------------------------------------------|-----------------------------------|----------------------------|----------------------------------|
| 1 <sup>a</sup> | 1                  | 0.41                                                 |                                   |                            |                                  |
| 1              | 1                  | 3.96 (3.55)                                          | 3.82                              | 0.12                       | AB: 97%<br>H <sub>2</sub> O: 93% |
| 2 <sup>a</sup> | 1                  | 0.13                                                 |                                   |                            |                                  |
| 2              | 1                  | 10.62 (10.49)                                        | 10.97                             | 0.18                       | AB: 98%<br>H <sub>2</sub> O: 95% |
| 3 <sup>a</sup> | 1                  | 0.06                                                 |                                   |                            |                                  |
| 3              | 1                  | 3.86 (3.80)                                          | 4.09                              | 0.22                       | AB: 95%<br>H <sub>2</sub> O: 93% |

<sup>a</sup>relative amount of water in DMSO-*d*<sub>6</sub>; <sup>b</sup>values in parentheses are corrected for residual water in the DMSO-*d*<sub>6</sub> solvent and arise from integration of NMR resonances.

**Table S3.** Relative Amounts of Water Produced from Reactions of  $[\text{Mn}^{\text{II}}\text{H}_2\text{bupa}]^-$  with DPH and Excess Dioxygen as Determined by Karl Fischer Titrations.

| Run | Amount<br>[ $\text{MnH}_2\text{bupa}$ ]<br>(g) | Amt.<br>DPH<br>(g) | Theor.<br>Amt. of<br>$\text{H}_2\text{O}$<br>(ppm) | Mass of<br>Sample<br>Used (g) | Experimental<br>Determined<br>$\text{H}_2\text{O}$ ( $\mu\text{g}$ /<br>ppm) | Mass of<br>Background<br>Sample (g) | Amount of<br>Water<br>In<br>Backgrd.<br>( $\mu\text{g}$ /ppm) | Percentage<br>of $\text{H}_2\text{O}$<br>Produced |
|-----|------------------------------------------------|--------------------|----------------------------------------------------|-------------------------------|------------------------------------------------------------------------------|-------------------------------------|---------------------------------------------------------------|---------------------------------------------------|
| 1   | 0.011g                                         | 0.069              | 2800                                               | 0.3001                        | 897 / 3000                                                                   | 0.2995                              | 128 / 430                                                     | 93%                                               |
| 2   | 0.014                                          | 0.088              | 3100                                               | 0.3589                        | 1210 / 3360                                                                  | 0.3700                              | 55 / 150                                                      | 105%                                              |

**Table S4.** Relative Amounts of Water Produced from Reactions of  $[\text{Mn}^{\text{II}}\text{H}_2\text{bupa}]^-$  with Hydrazine and Excess Dioxygen as Determined by  $^1\text{H}$  NMR Spectroscopy.

| Run            | Concentration<br>of Toluene | Relative<br>Amt.<br>Toluene | Relative Mole<br>Ratio of $\text{H}_2\text{O}^b$ | Equiv. of<br>$\text{H}_2\text{O}^c$ | Equiv. of<br>Hydrazine<br>Used <sup>c</sup> | Relative<br>Percent Yield<br>of $\text{H}_2\text{O}$ |
|----------------|-----------------------------|-----------------------------|--------------------------------------------------|-------------------------------------|---------------------------------------------|------------------------------------------------------|
| 1 <sup>a</sup> |                             | 1                           | 1.21                                             |                                     |                                             |                                                      |
| 1              | 0.160 M                     | 1                           | 3.14 (1.94)                                      | 17                                  | 8.79                                        | 97%                                                  |
| 2 <sup>a</sup> |                             | 1                           | 10.86                                            |                                     |                                             |                                                      |
| 2              | 1.46 M                      | 1                           | 12.89 (2.03)                                     | 15.24                               | 8.18                                        | 93%                                                  |
| 3 <sup>a</sup> |                             | 1                           | 6.82                                             |                                     |                                             |                                                      |
| 3              | 0.155 M                     | 1                           | 8.62 (1.80)                                      | 13.81                               | 7.62                                        | 91%                                                  |

<sup>a</sup>relative amount of water in  $\text{DMSO}-d_6$ ; <sup>b</sup>values in parentheses are corrected for residual water in the  $\text{DMSO}-d_6$  solvent; <sup>c</sup> the amount of  $[\text{Mn}(\text{H}_2\text{bupa})]^-$  was set to one equivalent.

**Table S5.** Crystallographic Data for  $\text{K}[\mathbf{1}] \cdot 0.5\text{DMA}$ .

| Salt                                         | $\text{K}[\mathbf{1}] \cdot 0.5\text{DMA}$                    |
|----------------------------------------------|---------------------------------------------------------------|
| Molecular formula                            | $\text{C}_{27}\text{H}_{47.5}\text{KMnN}_{7.5}\text{O}_{4.5}$ |
| Formula weight (g/mol)                       | 643.257                                                       |
| $T$ (K)                                      | 150(2)                                                        |
| Space group                                  | $P\bar{1}$                                                    |
| $a$ (Å)                                      | 15.687(4)                                                     |
| $b$ (Å)                                      | 20.310(5)                                                     |
| $c$ (Å)                                      | 25.983(7)                                                     |
| $\alpha$ (deg)                               | 95.152(4)                                                     |
| $\beta$ (deg)                                | 92.776(4)                                                     |
| $\gamma$ (deg)                               | 106.600(4)                                                    |
| $Z$                                          | 8                                                             |
| $V$ (Å <sup>3</sup> )                        | 7877(3)                                                       |
| $\delta_{\text{calcd}}$ (Mg/m <sup>3</sup> ) | 1.083                                                         |
| $R^a$                                        | 0.0920                                                        |
| $R_w^b$                                      | 0.2587                                                        |
| GOF <sup>c</sup>                             | 1.002                                                         |

<sup>a</sup>  $R = [\sum|\Delta F|/\sum|F_o|]$ . <sup>b</sup>  $R_w = \{\sum[\omega(F_o^2 - F_c^2)^2]/\sum[\omega(F_o^2)^2]\}^{1/2}$ .

<sup>c</sup> Goodness of fit on  $F^2$ .

**Table S6.** N—C bond distances of the protonated and deprotonated forms of the 2-carboxyamidopyridyl unit.

| Complex                                              | Protonation State | N—C bond distance (Å) |
|------------------------------------------------------|-------------------|-----------------------|
| <b>1</b>                                             | -                 | 1.338(7)              |
| [Mn <sup>II</sup> H <sub>2</sub> bupa] <sup>-</sup>  | deprotonated      | 1.305(5)              |
| [Fe <sup>II</sup> H <sub>2</sub> bupa] <sup>-a</sup> | deprotonated      | 1.308(5)              |
| [Mn <sup>II</sup> Hbpa <sup>a</sup> ] <sup>b,c</sup> | deprotonated      | 1.306(2)              |
|                                                      | protonated        | 1.368(2)              |
| [Fe <sup>II</sup> Hbpa <sup>a</sup> ] <sup>d</sup>   | deprotonated      | 1.307(2)              |
|                                                      | protonated        | 1.370(2)              |
| H <sub>5</sub> bupa <sup>d</sup>                     | protonated        | 1.366(6)              |
| H <sub>3</sub> bpaa <sup>d</sup>                     | protonated        | 1.371(2)              |
|                                                      | protonated        | 1.372(2)              |

<sup>a</sup>reference 1; <sup>b</sup>reference 2; <sup>c</sup>[Hbpa<sup>a</sup>]<sup>2-</sup>, *N*-[bis(6-pivalamido-2-pyridylmethyl)](*N'*-4-fluorophenylcarbamoylmethyl)aminato; <sup>d</sup>reference 3.

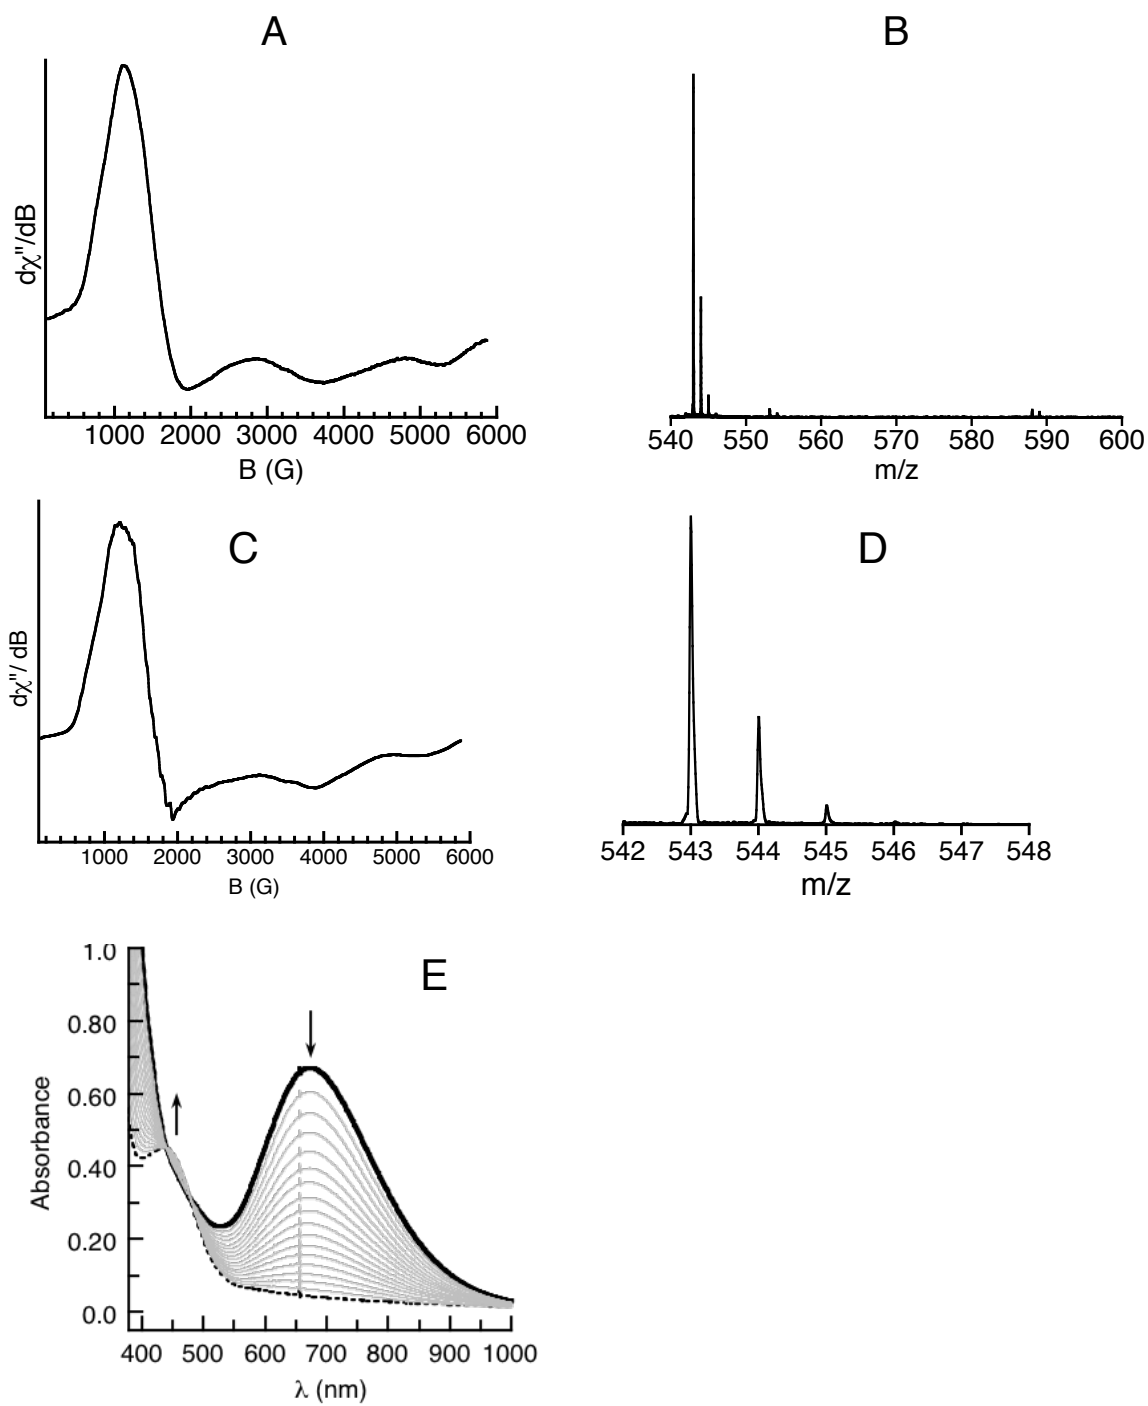

**Figure S1.** Perpendicular-mode X-band EPR spectrum (A) and ESI mass spectrum (B) after treating **1** with DPH, the corresponding spectra (C,D) of independently prepared  $[Mn^{II}H_2bupa]^-$ , and optical spectra showing the conversion of **1** (—) to  $[Mn^{II}H_2bupa]^-$  and azobenzene (---). The peak at  $\lambda_{max} \sim 440$  nm is from azobenzene.

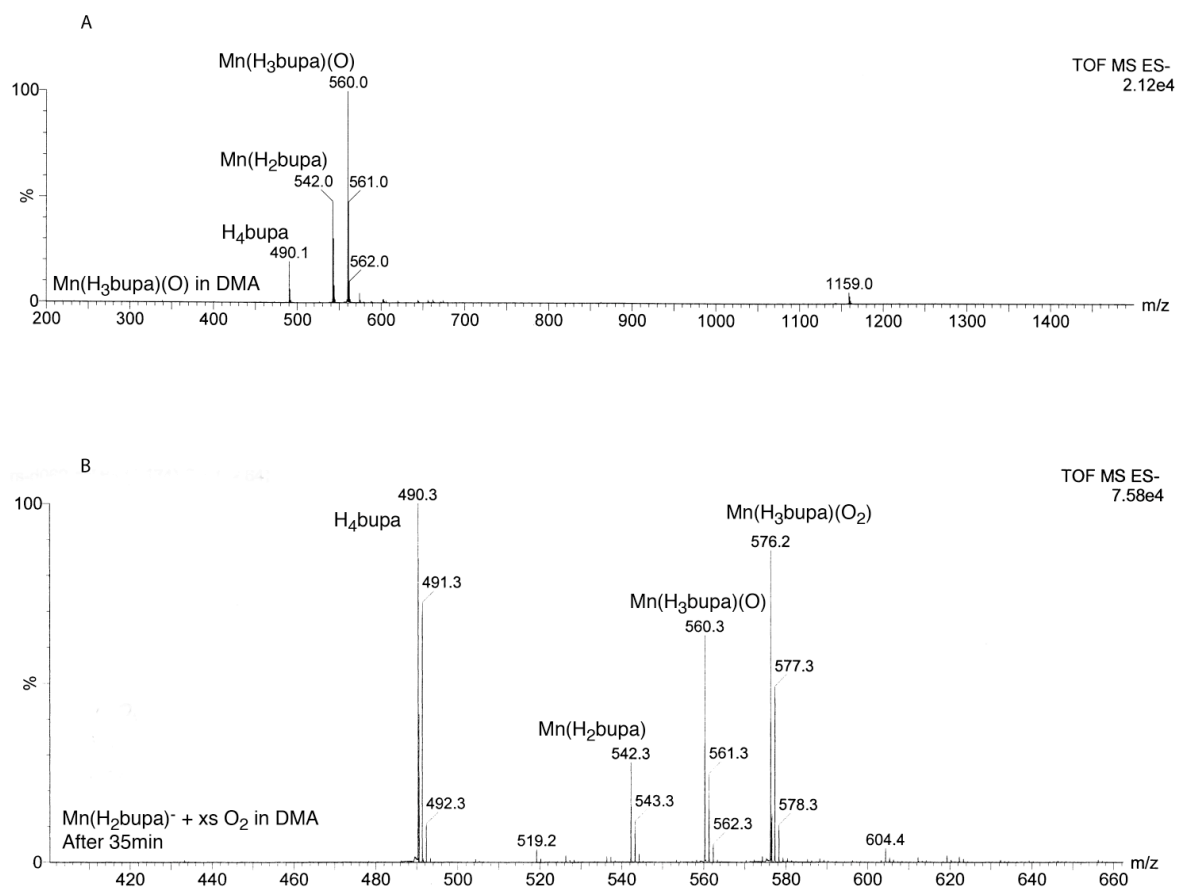

**Figure S2.** ESI-MS spectra (expanded-scale from those in Figure 2) for recrystallized **1** (A) and one for the reaction of  $[\text{Mn}^{\text{II}}\text{H}_2\text{bupa}]^-$  with dioxygen after  $\sim 40$  min, showing the presence of both  $[\text{Mn}^{\text{III}}\text{H}_3\text{bupa}(\text{O}_2)]^-$  to **1** (B). The small peak at  $m/z = 1159$  was modeled as a  $\text{K}\{[\text{Mn}^{\text{III}}\text{H}_3\text{bupa}(\text{O}_2)]^-\}_2$  aggregate.

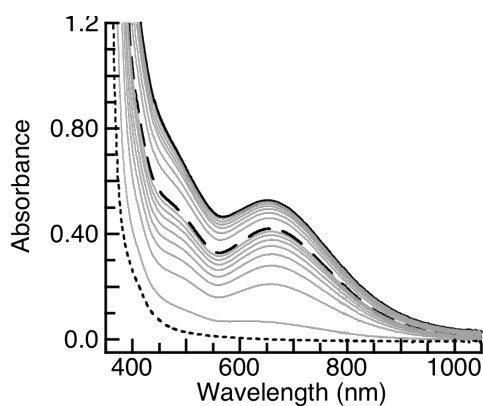

**Figure S3.** Electronic absorbance spectra illustrating the conversion of  $[\text{Mn}^{\text{II}}\text{H}_2\text{bupa}]^-$  to  $[\text{Mn}^{\text{III}}\text{H}_3\text{bupa}(\text{O}_2)]^-$  (---), and  $[\text{Mn}^{\text{III}}\text{H}_3\text{bupa}(\text{O}_2)]^-$  to **1** (—) measured in DMA at room temperature. Spectra for the formation of  $[\text{Mn}^{\text{III}}\text{H}_3\text{bupa}(\text{O}_2)]^-$  were recorded every 10 min and those for the conversion of  $[\text{Mn}^{\text{III}}\text{H}_3\text{bupa}(\text{O}_2)]^-$  to **1** were collected every 30 min (total time was 5 h). The concentration of  $[\text{Mn}^{\text{II}}\text{H}_2\text{bupa}]^-$  was 2.1 mM.

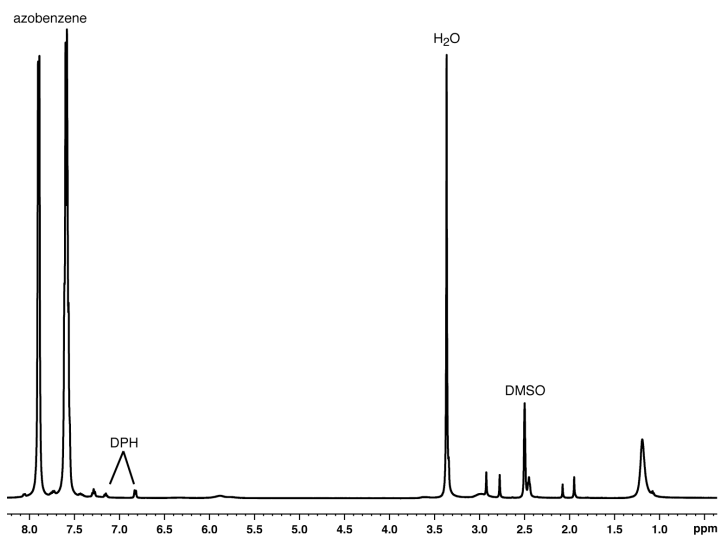

**Figure S4.** Example of an  $^1\text{H}$  NMR spectrum for the conversion of DPH to azobenzene with  $[\text{Mn}^{\text{II}}\text{H}_2\text{bupa}]^-$  and  $\text{O}_2$ .
